# Supplementary material for: Effect of Melittin on Metabolomic Profile and Cytokine Production in PMA-Differentiated THP-1 Cells
Source: PubMed Central journal article supplement (PMC6313865; doi:10.3390/vaccines6040072), 2018-10-13
Supplement: vaccines-06-00072-s001.pdf [file vaccines-06-00072-s001.pdf]

## Supplementary Materials: Effect of Melittin on Metabolomic Profiling and Cytokine Production in PMA-Differentiated THP-1 Cells

Abdulmalik Alqarni, Valerie A. Ferro, John A. Parkinson, Mark Dufton and David G. Watson

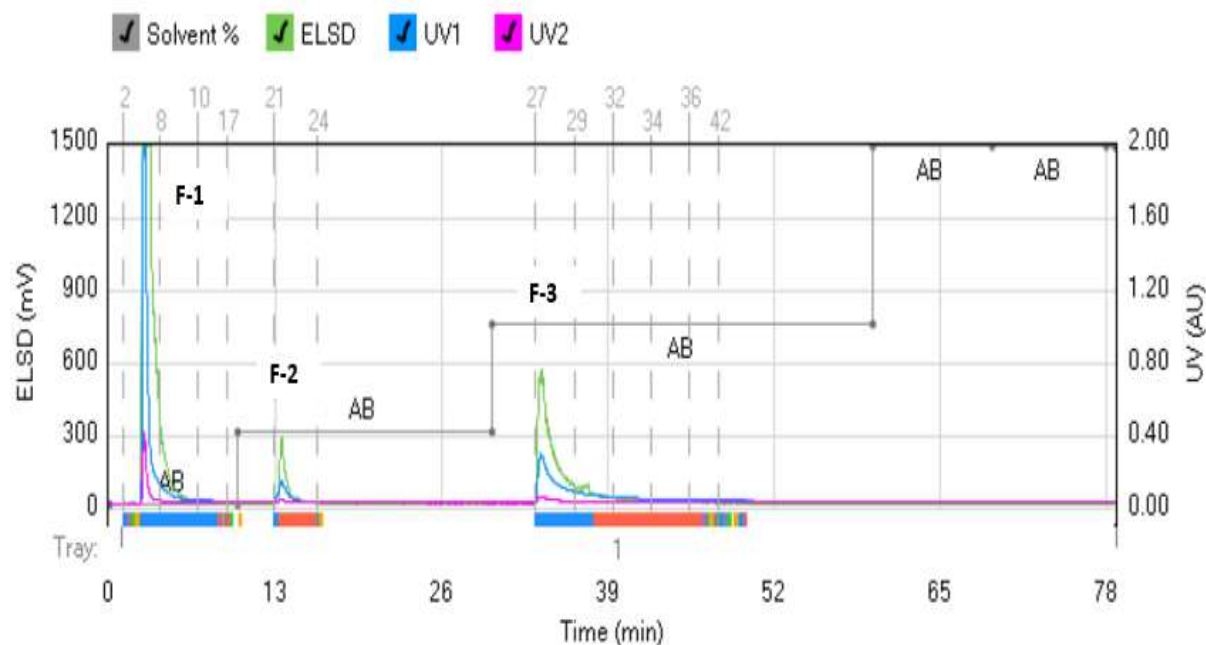

**Figure S1:** Chromatogram obtained from MPLC for the separation of BV components using the Grace® system. Generic C18, 24g column used; solvents: water (A) and acetonitrile (B) with a gradient of 0-10 min (0% B), 10-20 min (20% B), 20-30 min (50% B), 30-60 min (60% B), 60-70 min (100% B). The colours on the x-axis represent separate collections across with of the peak.

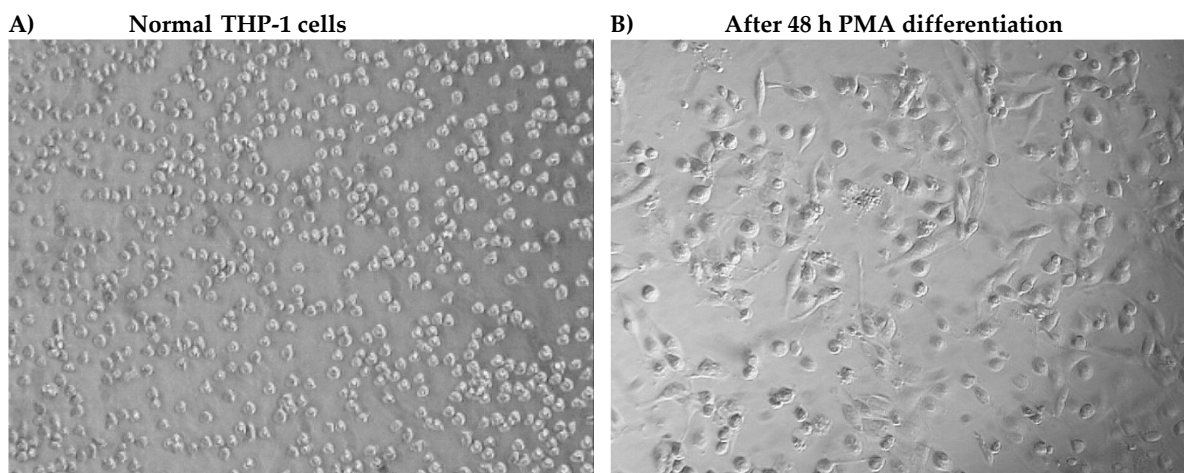

**Figure S2:** Negative control THP-1 cells (A) and it is derived macrophages by the effect of PMA treatment (B) at final concentration of 60ng/mL.

### TNF-α production

**Table S1:** Effect of melittin (Mel) on the production of TNF-α cytokines in the presence and absence of LPS on PMA-differentiated THP-1 cells (n=3).

| Dose (µg/ml) | TNF-α concentration (pg/ml) |         |        |         |        |                  |      |                |         |
|--------------|-----------------------------|---------|--------|---------|--------|------------------|------|----------------|---------|
|              | Media                       | LPS     |        | Sample  |        | Sample + 0.5 LPS |      | Sample + 1 LPS |         |
|              |                             | 0.5 LPS | 1 LPS  | 0.5 Mel | 1 Mel  | 0.5 Mel          | 1Mel | 0.5 Mel        | 1 Mel   |
| n=1          | 458                         | 1856    | 1862   | 315     | 381    | 1942             | 1879 | 1947           | 1885    |
| n=2          | 736                         | 1830    | 1848   | 833     | 752    | 1839             | 1881 | 1869           | 1825    |
| n=3          | 561                         | 1776    | 1847   | 482     | 722    | 1859             | 1826 | 1881           | 1862    |
| Mean         | 585                         | 1820.67 | 1852.3 | 543.33  | 618.33 | 1880             | 1862 | 1899           | 1857.33 |
| RSD          | 24.02                       | 2.24    | 0.45   | 48.66   | 33.33  | 2.91             | 1.68 | 2.21           | 1.63    |
| p.value      | n/a                         | <0.001  | <0.001 | ns      | ns     | ns               | ns   | ns             | ns      |

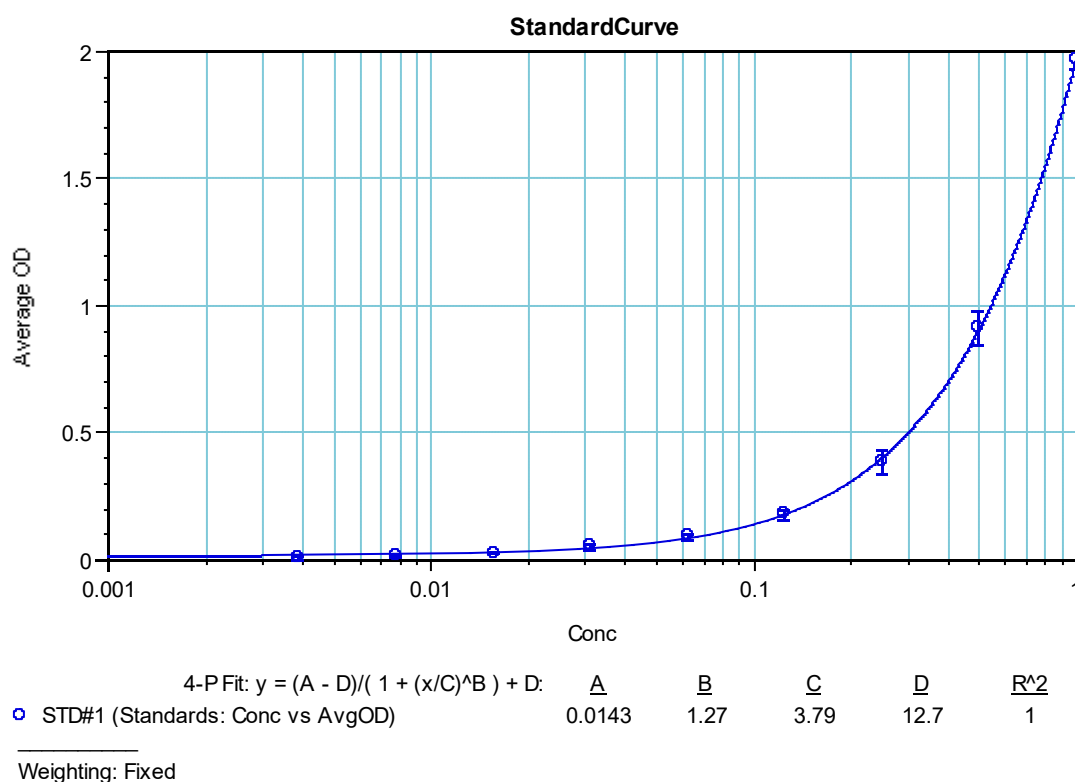

**Figure S3:** A representative 4-parameter logistic plot of TNF-α standard samples of 9 points showing the values of a, b, c, and d constants and the calibration equation with a perfect fit (R<sup>2</sup>=1.0). The data represents the mean ± SD of optical density (OD) values for duplicate standard concentrations (n=2).

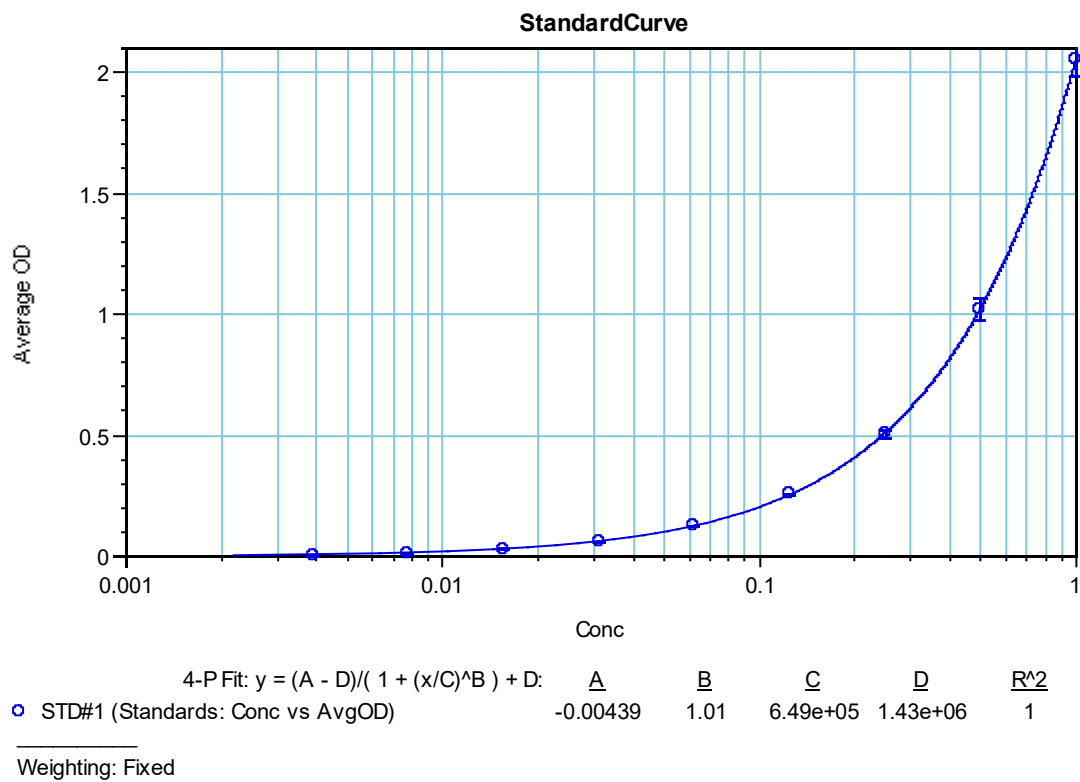

**Figure S4:** A representative 4-parameter logistic plot of TNF- $\alpha$  standard samples of 9 points showing the values of a, b, c, and d constants and the calibration equation with a perfect fit ( $R^2=1.0$ ). The data represents the mean  $\pm$  SD of optical density (OD) values for duplicate standard concentrations ( $n=2$ ).

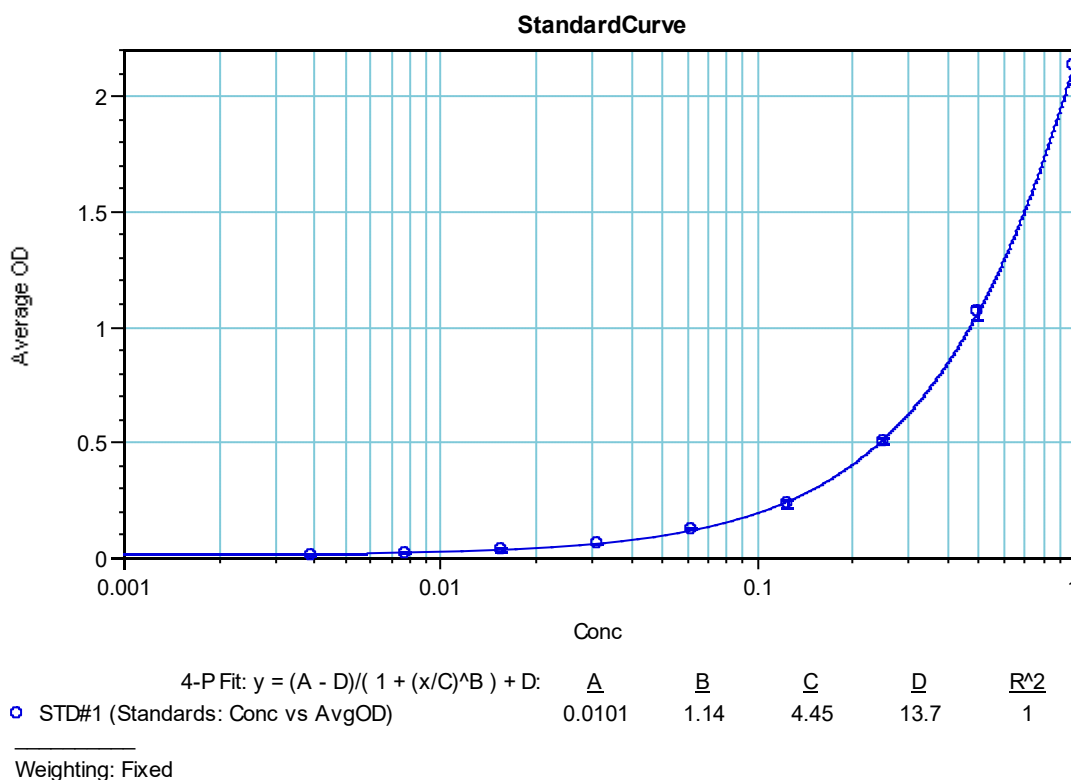

**Figure S5:** A representative 4-parameter logistic plot of TNF- $\alpha$  standard samples of 9 points showing the values of a, b, c, and d constants and the calibration equation with a perfect fit ( $R^2=1.0$ ). The data represents the mean  $\pm$  SD of optical density (OD) values for duplicate standard concentrations ( $n=2$ ).

### IL-1 $\beta$ production

**Table S2:** Effect of melittin (Mel) on the production of IL-1 $\beta$  cytokines in the presence and absence of LPS on PMA-differentiated THP-1 cells ( $n=3$ ).

| Dose<br>( $\mu$ g/ml) | IL-1 $\beta$ concentration (pg/ml) |         |       |         |        |                 |       |                |        |
|-----------------------|------------------------------------|---------|-------|---------|--------|-----------------|-------|----------------|--------|
|                       | Media                              | LPS     |       | Sample  |        | Sample+ 0.5 LPS |       | Sample + 1 LPS |        |
|                       |                                    | 0.5 LPS | 1 LPS | 0.5 Mel | 1 Mel  | 0.5 Mel         | 1Mel  | 0.5 Mel        | 1Mel   |
| n=1                   | 10.5                               | 48.5    | 52    | 16      | 85     | 80              | 175   | 70             | 200    |
| n=2                   | 45                                 | 92      | 86    | 73      | 115    | 130             | 137   | 147            | 161    |
| n=3                   | 41                                 | 99      | 108   | 80      | 157    | 137             | 141   | 138            | 150    |
| <b>Mean</b>           | 32.17                              | 79.83   | 82.00 | 56.33   | 119.00 | 115.67          | 151   | 118.33         | 170.33 |
| <b>RSD</b>            | 58.66                              | 34.27   | 34.41 | 62.32   | 30.39  | 26.88           | 13.83 | 35.58          | 15.43  |
| <b>p.value</b>        | n/a                                | ns      | ns    | ns      | 0.021  | ns              | 0.026 | ns             | 0.017  |

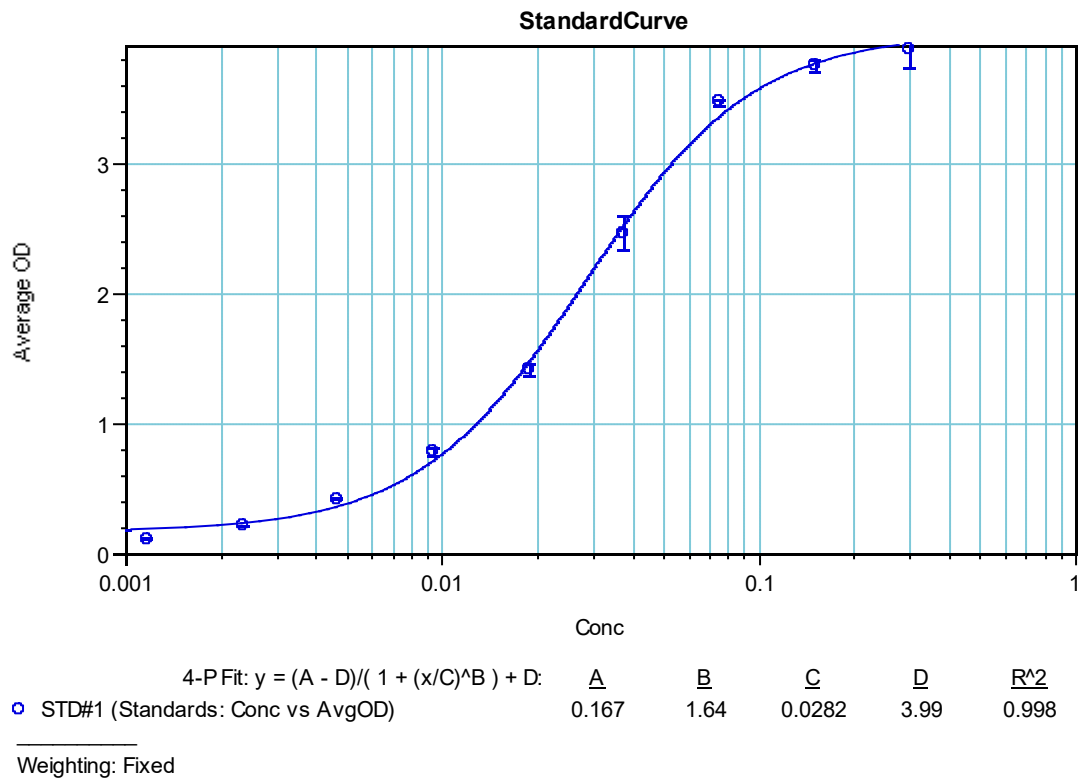

**Figure S6:** A representative 4-parameter logistic plot of IL-1 $\beta$  standard samples of 9 points showing the values of a, b, c, and d constants and the calibration equation with a good fit ( $R^2=0.998$ ). The data represents the mean  $\pm$  SD of optical density (OD) values for duplicate standard concentrations ( $n=2$ ).

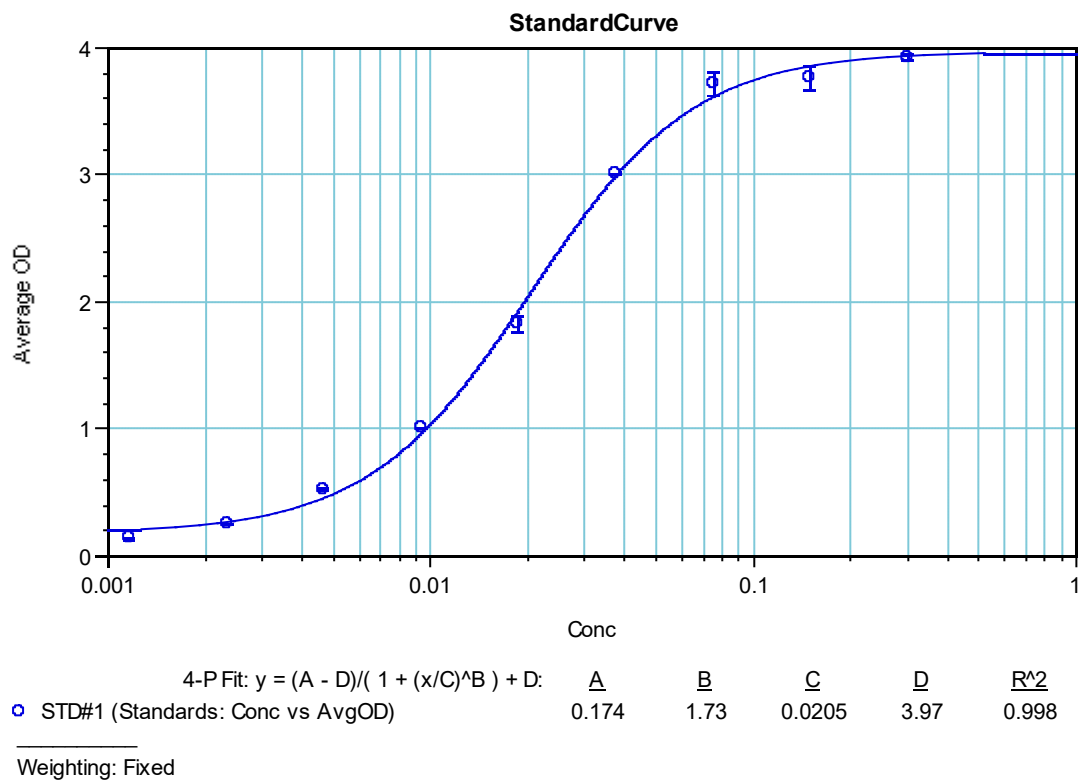

**Figure S7:** A representative 4-parameter logistic plot of IL-1 $\beta$  standard samples of 9 points showing the values of a, b, c, and d constants and the calibration equation with a good fit ( $R^2=0.998$ ). The data represents the mean  $\pm$  SD of optical density (OD) values for duplicate standard concentrations ( $n=2$ ).

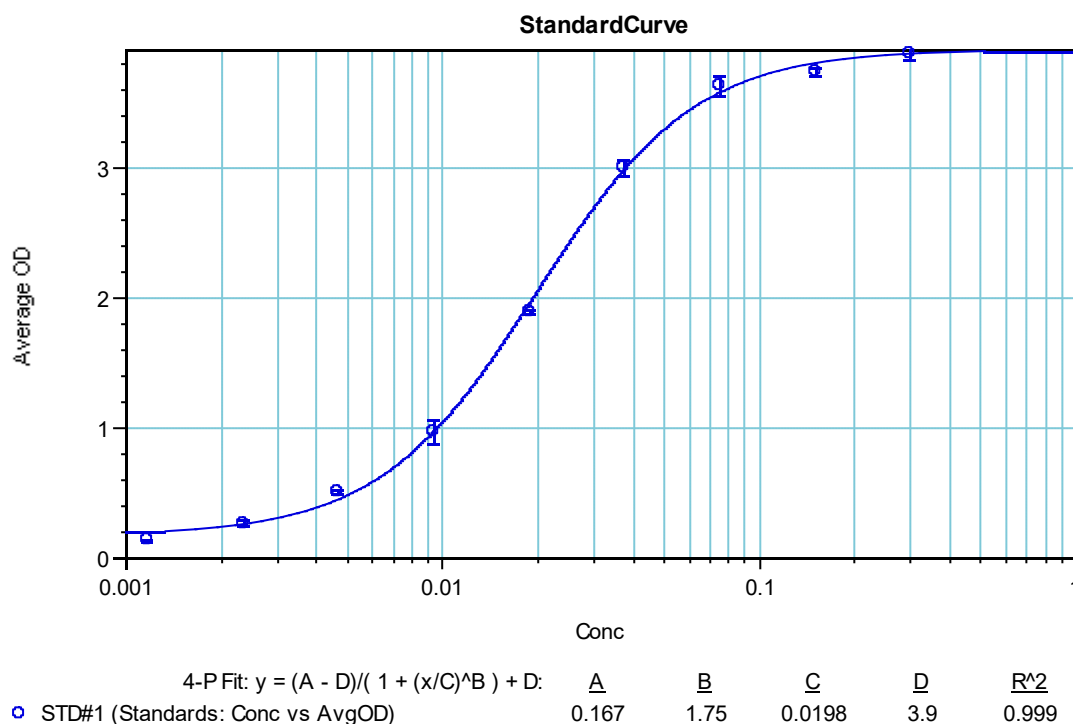

**Figure S8:** A representative 4-parameter logistic plot of IL-1 $\beta$  standard samples of 9 points showing the values of a, b, c, and d constants and the calibration equation with a perfect fit ( $R^2=0.999$ ). The data represents the mean  $\pm$  SD of optical density (OD) values for duplicate standard concentrations ( $n=2$ ).

### IL-6 production

**Table S3:** Effect of melittin (Mel) on the production of IL-6 cytokines in the presence and absence of LPS on PMA-differentiated THP-1 cells ( $n=3$ ).

| Dose ( $\mu\text{g/ml}$ ) | IL-6 concentration (pg/ml) |         |        |         |                  |                |
|---------------------------|----------------------------|---------|--------|---------|------------------|----------------|
|                           | Media                      | LPS     |        | Sample  | Sample + 0.5 LPS | Sample + 1 LPS |
|                           |                            | 0.5 LPS | 1 LPS  | 0.5 Mel | 0.5 Mel          | 0.5 Mel        |
| n=1                       | < 2.0                      | 41      | 99     | < 2.0   | 82               | 132            |
| n=2                       | < 2.0                      | 100     | 108    | < 2.0   | 106              | 133            |
| n=3                       | < 2.0                      | 98      | 116    | < 2.0   | 113              | 144            |
| Mean                      | n/a                        | 79.66   | 107.66 | n/a     | 100.33           | 136.33         |
| RSD                       | n/a                        | 42.05   | 7.89   | n/a     | 16.20            | 4.88           |
| P value                   | n/a                        | n/a     | n/a    | n/a     | ns               | 0.010          |

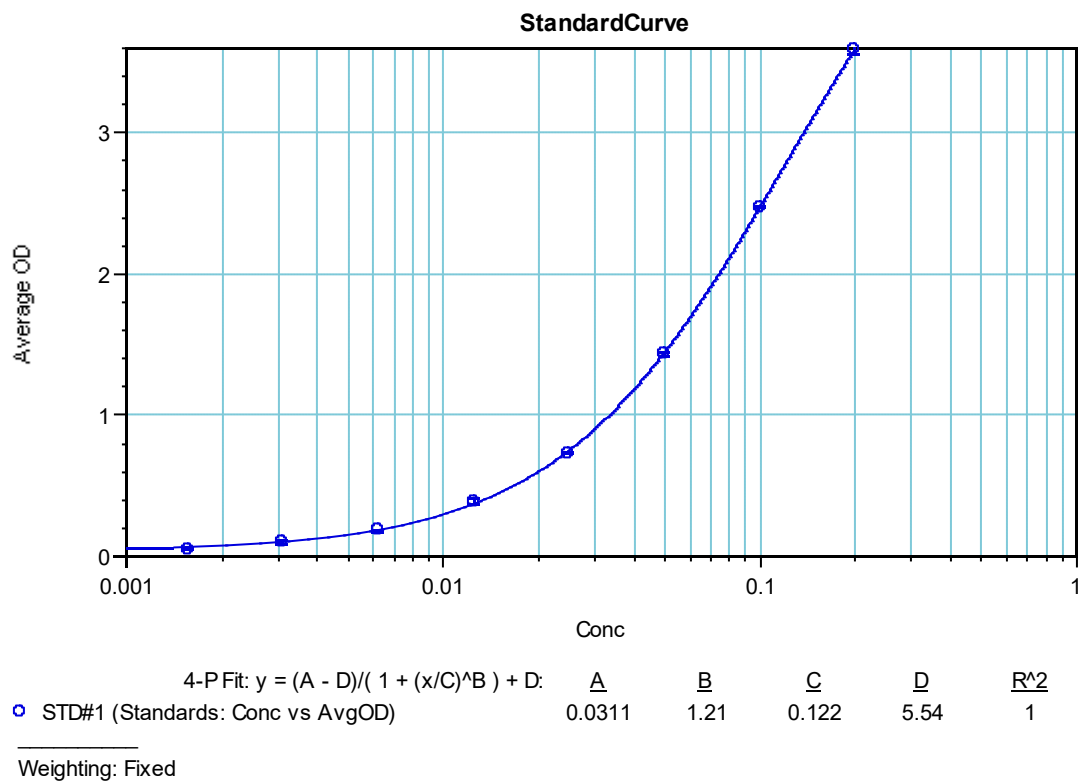

**Figure S9:** A representative 4-parameter logistic plot of IL-6 standard samples of 8 points showing the values of a, b, c, and d constants and the calibration equation with a perfect fit ( $R^2=1$ ). The data represents the mean  $\pm$  SD of optical density (OD) values for duplicate standard concentrations ( $n=2$ ).



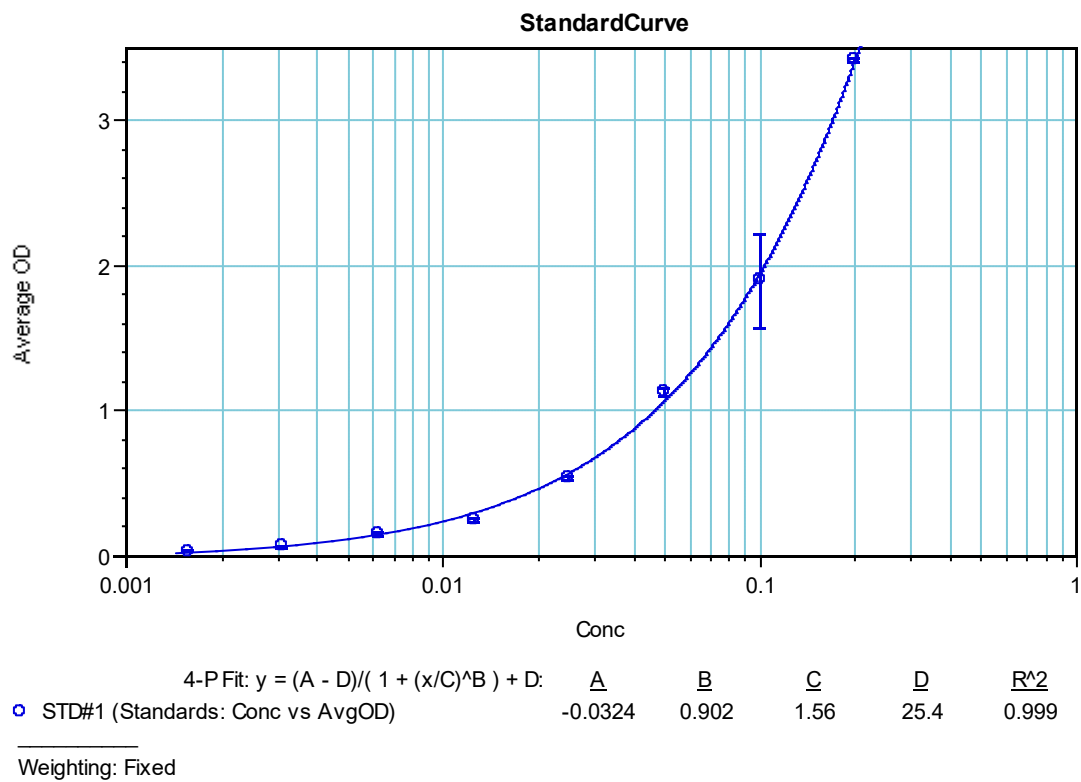

**Figure S10:** A representative 4-parameter logistic plot of IL-6 standard samples of 8 points showing the values of a, b, c, and d constants and the calibration equation with a perfect fit ( $R^2=0.999$ ). The data represents the mean  $\pm$  SD of optical density (OD) values for duplicate standard concentrations ( $n=2$ ).

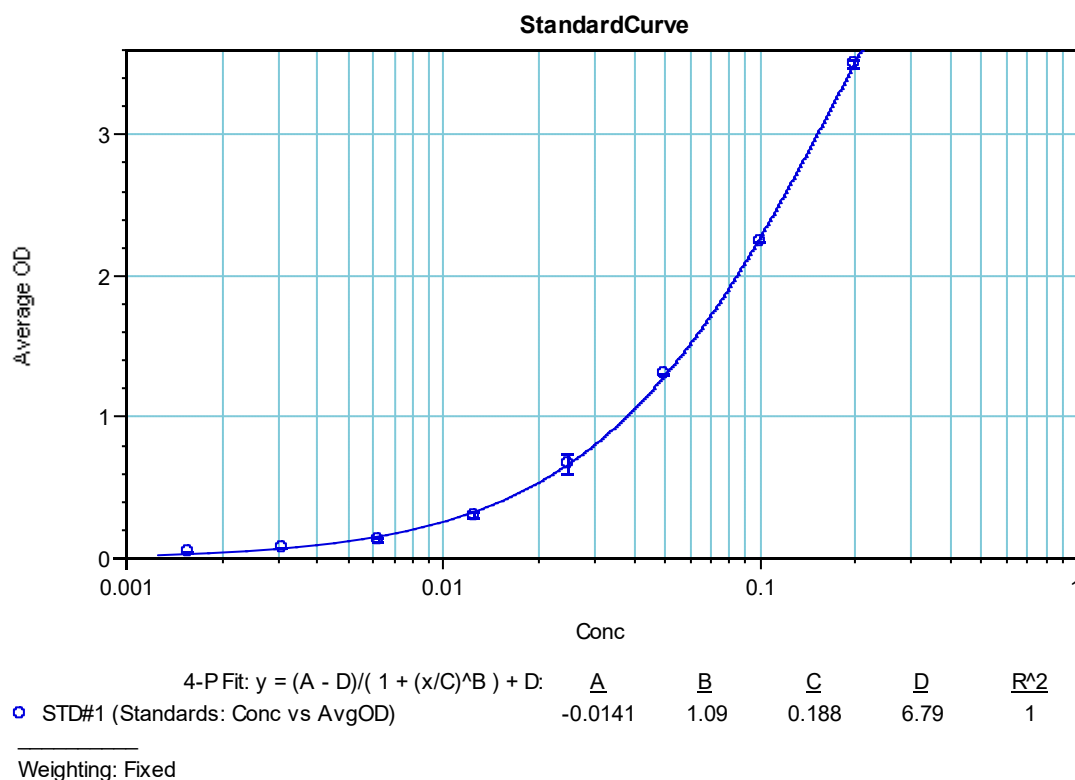

**Figure S11:** A representative 4-parameter logistic plot of IL-6 standard samples of 8 points showing the values of a, b, c, and d constants and the calibration equation with a perfect fit ( $R^2=1$ ). The data represents the mean  $\pm$  SD of optical density (OD) values for duplicate standard concentrations ( $n=2$ ).

### IL-10 production

**Table S4:** Effect of melittin (Mel) on the production of IL-10 cytokines in the presence and absence of LPS on PMA-differentiated THP-1 cells ( $n=3$ ).

| Dose<br>( $\mu\text{g/ml}$ ) | IL-10 concentration (pg/ml) |         |       |         |                  |                |
|------------------------------|-----------------------------|---------|-------|---------|------------------|----------------|
|                              | Media                       | LPS     |       | Sample  | Sample + 0.5 LPS | Sample + 1 LPS |
|                              |                             | 0.5 LPS | 1 LPS | 0.5 Mel | 0.5 Mel          | 0.5 Mel        |
| n=1                          | 27.5                        | 62      | 52    | 24      | 56               | 57             |
| n=2                          | 17                          | 30      | 41    | 12      | 32               | 33             |
| n=3                          | 20                          | 40      | 40    | 20      | 26               | 34             |
| <b>Mean</b>                  | 21.50                       | 44.00   | 44.33 | 18.67   | 38.00            | 41.33          |
| <b>RSD</b>                   | 25.16                       | 37.21   | 15.02 | 32.73   | 41.78            | 32.85          |
| <b>P value</b>               | n/a                         | ns      | 0.010 | ns      | ns               | ns             |

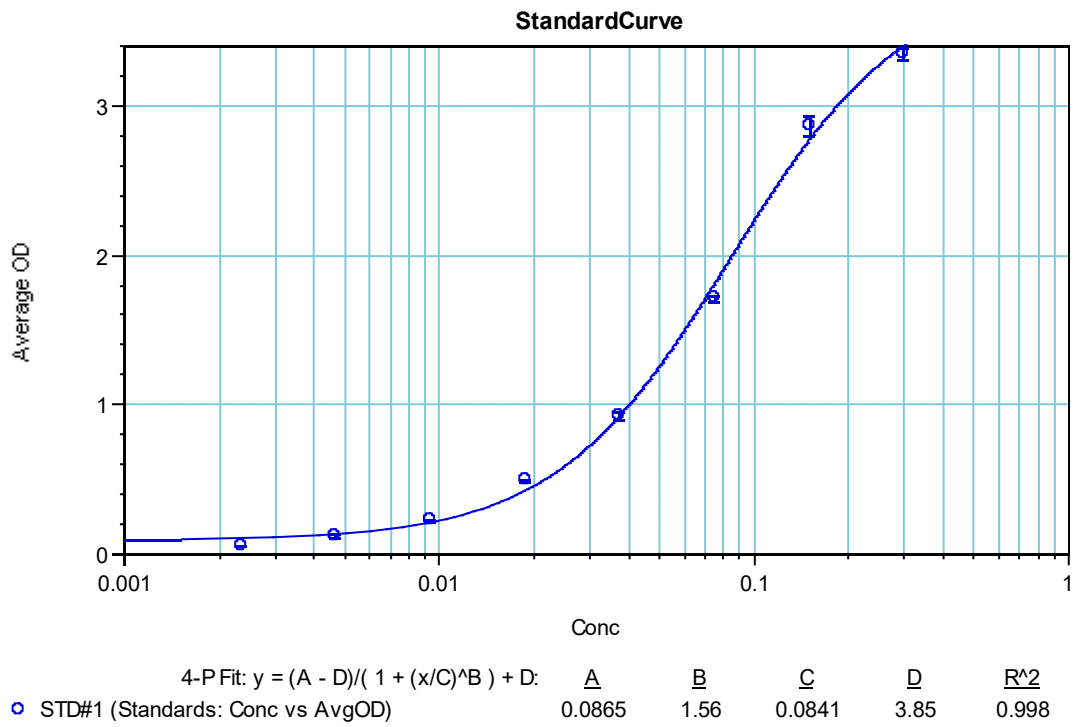

Weighting: Fixed

**Figure S12:** A representative 4-parameter logistic plot of IL-10 standard samples of 8 points showing the values of a, b, c, and d constants and the calibration equation with a good fit ( $R^2=0.998$ ). The data represents the mean  $\pm$  SD of optical density (OD) values for duplicate standard concentrations ( $n=2$ ).

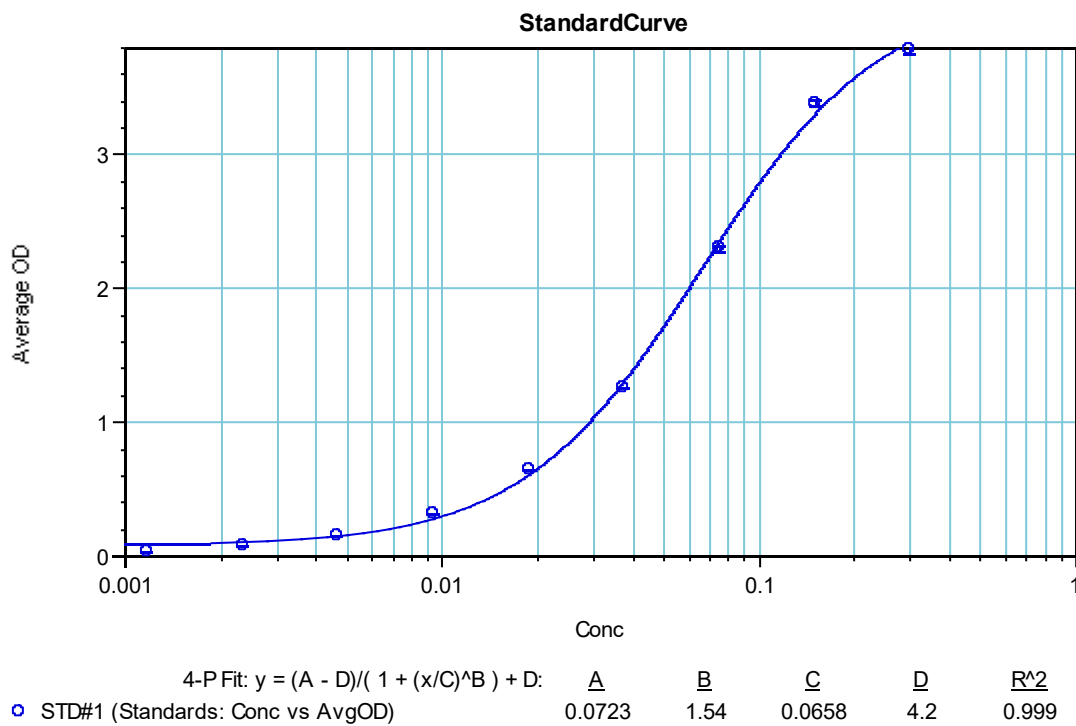

Weighting: Fixed

**Figure S13:** A representative 4-parameter logistic plot of IL-10 standard samples of 8 points showing the values of a, b, c, and d constants and the calibration equation with a perfect fit ( $R^2=0.999$ ). The data represents the mean  $\pm$  SD of optical density (OD) values for duplicate standard concentrations ( $n=2$ ).

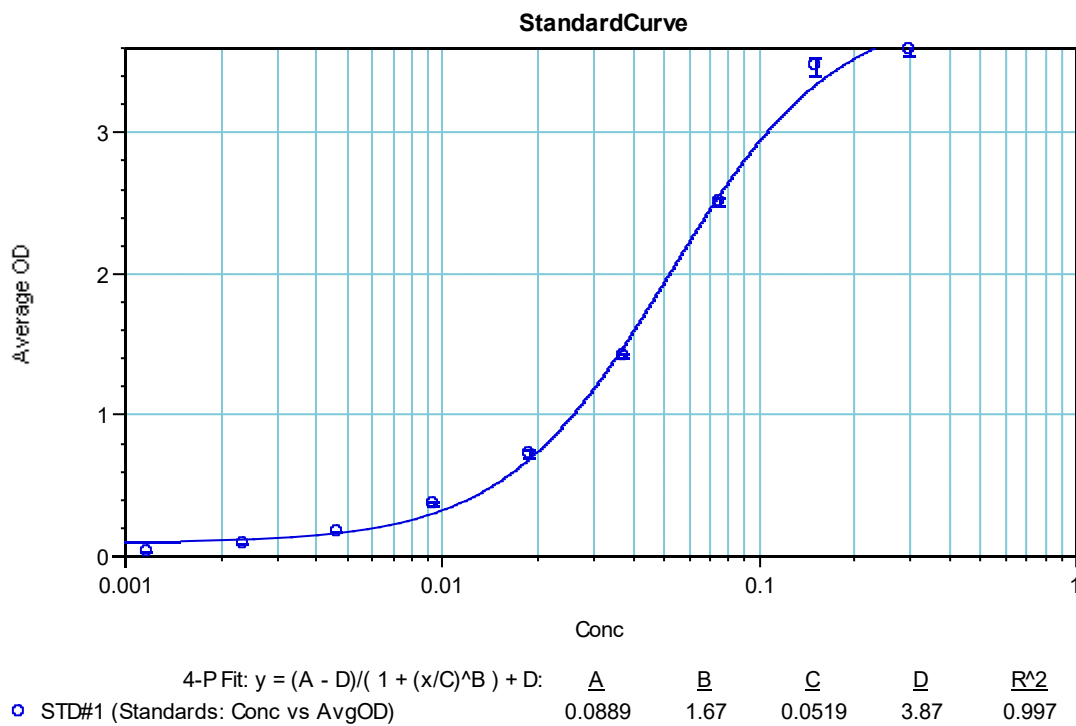

Weighting: Fixed

**Figure S14:** A representative 4-parameter logistic plot of IL-10 standard samples of 8 points showing the values of a, b, c, and d constants and the calibration equation with a good fit ( $R^2=0.997$ ). The data represents the mean  $\pm$  SD of optical density (OD) values for duplicate standard concentrations ( $n=2$ ).

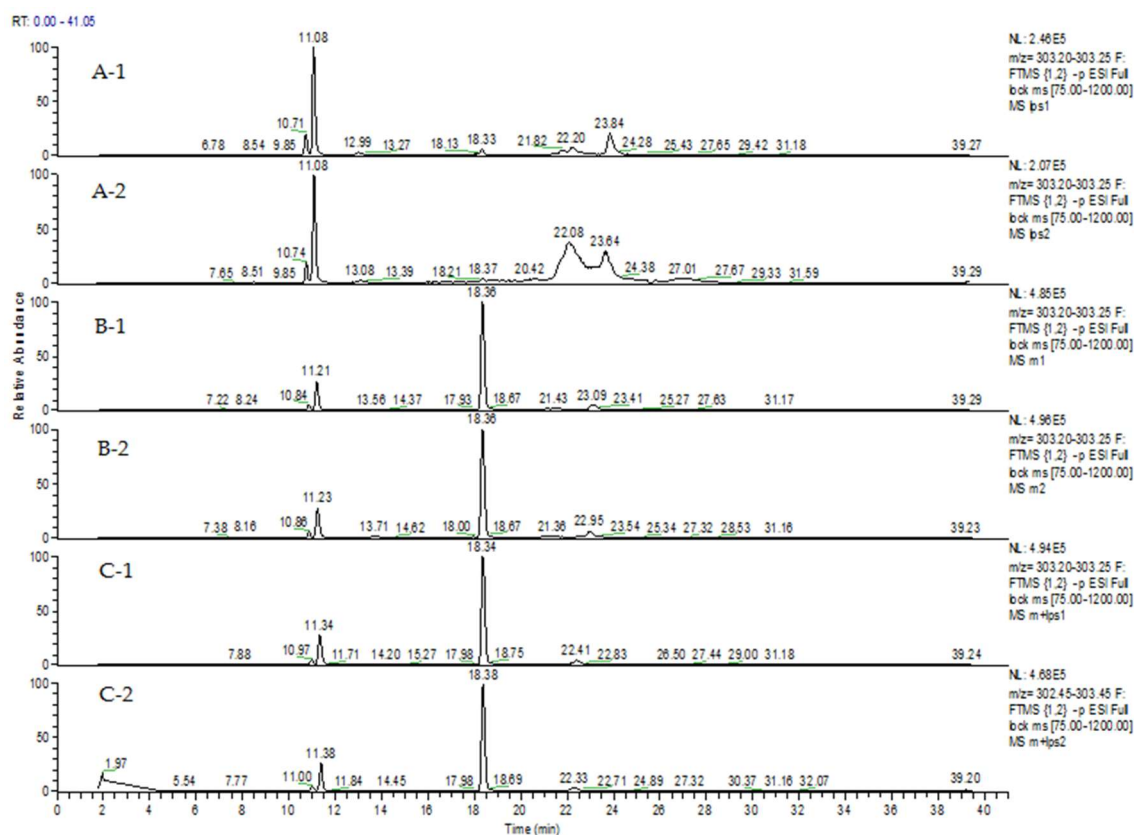

**Figure S15:** Extracted ion chromatograms for arachidonic acid in THP-1 cells after treated by LPS (A), melittin (B) and the combination of melittin and LPS (C). The level of the arachidonic acid elevated significantly by melittin alone or in combination with LPS. The biological samples were analysed using ACE C4 column.

**Table S5:** List of abbreviation used in this study.

| List of Abbreviations |                                                           |
|-----------------------|-----------------------------------------------------------|
| HILIC                 | Hydrophilic Interaction Liquid Chromatography             |
| RP                    | Reversed Phase                                            |
| HPLC                  | High Performance Liquid Chromatography                    |
| LC-MS                 | liquid chromatography-mass spectrometry                   |
| UPLC-MS               | Ultra-Performance Liquid Chromatograph- Mass Spectrometer |
| NMR                   | Nuclear Magnetic Resonance                                |
| ELISAs                | Enzyme-linked immunosorbent assay                         |
| SIMCA                 | Soft-Independent Modelling of Class Analogy               |
| OPLS-DA               | Orthogonal Partial Least Squares Discriminant Analysis    |
| PCA                   | Principal Component Analysis                              |
| QC                    | Quality control                                           |
| RT                    | Retention Time                                            |
| PLA2                  | Phospholipase A2                                          |
| PBS                   | Phosphate Buffered Saline                                 |
| KEGG                  | Kyoto Encyclopedia of Genes and Genomes                   |
| TCA                   | Cycle Tricarboxylic Acid cycle                            |
| OXPPOS                | Oxidative phosphorylation                                 |
| ATP                   | Adenosine Triphosphate                                    |
| ADP                   | Adenosine Diphosphate                                     |

|                        |                                                        |
|------------------------|--------------------------------------------------------|
| NAD+                   | Nicotinamide Adenine Dinucleotide (oxidised)           |
| NADH                   | Nicotinamide Adenine Dinucleotide (reduced)            |
| NADP+                  | Nicotinamide Adenine Dinucleotide phosphate (oxidised) |
| NADPH                  | Nicotinamide Adenine Dinucleotide phosphate (reduced)  |
| F-2,6-BP               | Fructose-2,6-bisphosphate                              |
| F6P                    | Fructose-6-phosphate                                   |
| G6P                    | Glucose-6-phosphate                                    |
| G3P                    | glyceraldehyde-3-phosphate                             |
| S7P                    | Sedoheptulose 7-phosphate                              |
| IMP                    | Inosine monophosphate                                  |
| AMP                    | Adenosine monophosphate                                |
| CDP                    | Cytidine diphosphate                                   |
| CTP                    | Cytidine Triphosphate                                  |
| UTP                    | Uridine-5'-triphosphate                                |
| UDP                    | Uridine diphosphate                                    |
| UMP                    | Uridine monophosphate                                  |
| 4-GB                   | 4-Guanidinobutanoate                                   |
| G6S                    | D-Glucose 6-sulfate                                    |
| GLP                    | Glycerone phosphate                                    |
| 3PG                    | 3-Phospho-D-glycerate                                  |
| Arg. Succ.             | N-(L-Arginino)succinate                                |
| Glu-1,6-L-6-P          | D-Glucono-1,5-lactone 6-phosphate                      |
| 5-Hydroxy-L-tryp.      | 5-Hydroxy-L-tryptophan                                 |
| PMA                    | Phorbol 12-myristate 13-acetate                        |
| PC                     | Phosphocholines                                        |
| PI                     | Phosphoinositol                                        |
| PS                     | Phosphoserines                                         |
| PG                     | Phosphoglycerols                                       |
| LPS                    | Lipopolysaccharide                                     |
| Mel                    | Melittin                                               |
| PAMPs                  | Pathogen-associated molecular patterns                 |
| PRRs                   | Pattern Recognition Receptors                          |
| TLRs                   | Toll-like receptors                                    |
| ROS                    | Reactive oxygen species                                |
| iNOS                   | Nitric oxide synthase                                  |
| NO                     | Nitric oxide                                           |
| HIF-1 $\alpha$         | Hypoxia inducible factor-1 $\alpha$                    |
| 5'TOP                  | 5'-terminal oligopyrimidine                            |
| AMPK                   | Adenosine monophosphate-activated protein kinase       |
| PFK2                   | Phosphofructokinase-2                                  |
| mTOR                   | Mammalian target of rapamycin                          |
| MCD                    | Mast cell degranulating                                |
| BV                     | Bee venom                                              |
| PGE2                   | Prostaglandin E2                                       |
| Nuclear factor kappa B | NF- $\kappa$ B                                         |

**Table S6:** List of catalog/serial number of instruments and reagents used in this study.

|                                       | Catalog/serial numbers |
|---------------------------------------|------------------------|
| HPLC                                  | 5035.0016              |
| MS                                    | SN01059P               |
| Reveleris® iES system                 | 1912L00078             |
| plate reader                          | MV02120                |
| ZIC-pHILIC column                     | 543895                 |
| ACE C4 column                         | A73193                 |
| TNF- $\alpha$ ELISA Ready-Set-Go kits | 88-7346-88             |
| IL-1 $\beta$ ELISA Ready-Set-Go kits  | 88-7261-88             |

---

|                               |              |
|-------------------------------|--------------|
| IL-6 ELISA Ready-Set-Go kits  | 88-7066-88   |
| IL-10 ELISA Ready-Set-Go kits | 88-7106-88   |
| RPMI 1640 media               | 15-040-CVR   |
| foetal calf serum             | F13-1090/500 |
| L-glutamine solution          | RNBF8011     |
| Penicillin/Streptomycin       | 015M4769V    |

---

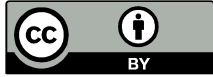

© 2018 by the authors. Submitted for possible open access publication under the terms and conditions of the Creative Commons Attribution (CC BY) license (<http://creativecommons.org/licenses/by/4.0/>).
